# Supplementary material for: Using Sequence Similarity Networks for Visualization of Relationships Across Diverse Protein Superfamilies
Source: PubMed Central journal article supplement (PMC2631154; doi:10.1371/journal.pone.0004345), 2009-02-03

**Fig S1. Network distances are similar between the Organic and Cytoscape force-directed layout weighted by E-value.**

This page: Statistics (A) describing the comparison of the kinase network from Fig. 3 laid out using the Organic layout (B) or the Cytoscape force-directed layout weighted by edge E-value (C).

Following page: Statistics (D) describing the comparison of the amine GPCR network from Fig. 2B laid out using the Organic layout (E) or the Cytoscape force-directed layout weighted by edge E-value (F).

| A. BLAST E-values                                      | A.<br>BLAST E-values                                          |                                                               |
|--------------------------------------------------------|---------------------------------------------------------------|---------------------------------------------------------------|
| B. Organic layout                                      | R: $0.934 \pm 0.003$<br>Z: 41.2<br>P: 0.0                     | B.<br>Organic layout                                          |
| C. Cytoscape force-directed layout weighted by E-value | R: $0.895 \pm 0.003$<br>Z: 35.3<br>P: $7.02 \times 10^{-273}$ | R: $0.900 \pm 0.003$<br>Z: 36.8<br>P: $2.92 \times 10^{-297}$ |

Pearson's correlations (R) and associated Z-scores (Z) and P-values (P) describing the similarity between the relative pairwise distances between 419 human kinase domain sequences in common as assessed by (A) all shortest paths between  $-\log_{10}(\text{BLAST E-values})$ , (B) the shortest paths between sequences as displayed by the Organic two-dimensional graph layout algorithm, and (C) the shortest paths between sequences in the two dimensional Cytoscape force-directed layout, weighted by BLAST E-value. The pairwise BLAST E-values and the graph layout algorithm correspond to a network thresholded at an E-value of  $1 \times 10^{-25}$ .

**B. Organic Layout**

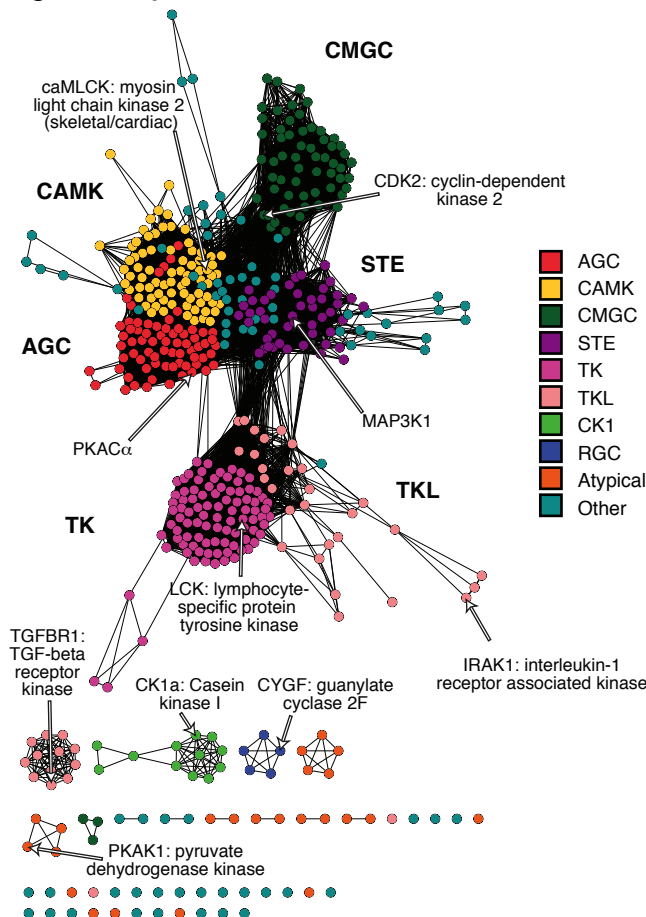

**C. Force-directed layout weighted by E-value**

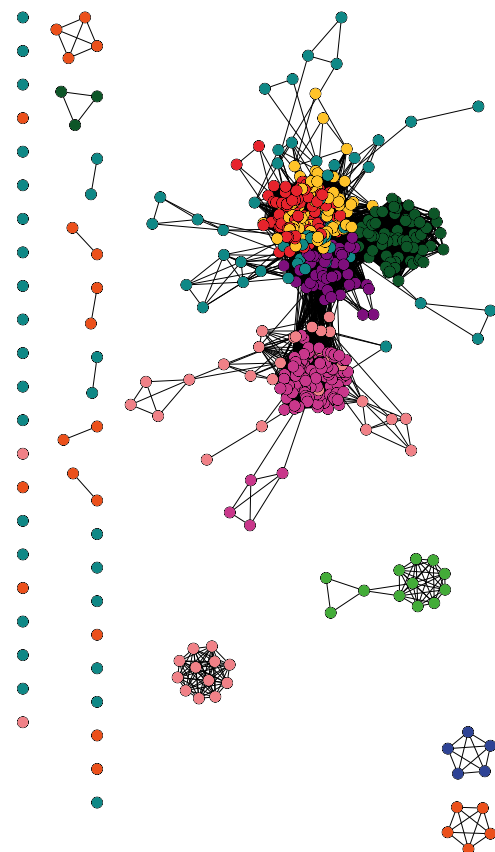

**Fig S1. Continued**

**D.**

|                                                        |                                                               |                                                               |
|--------------------------------------------------------|---------------------------------------------------------------|---------------------------------------------------------------|
| A. BLAST E-values                                      | A.<br>BLAST E-values                                          |                                                               |
| B. Organic layout                                      | R: $0.906 \pm 0.034$<br>Z: 11.87<br>P: $8.04 \times 10^{-33}$ | B.<br>Organic layout                                          |
| C. Cytoscape force-directed layout weighted by E-value | R: $0.850 \pm 0.034$<br>Z: 9.52<br>P: $8.78 \times 10^{-22}$  | R: $0.877 \pm 0.035$<br>Z: 10.16<br>P: $1.47 \times 10^{-24}$ |

Pearson's correlations (R) and associated Z-scores (Z) and P-values (P) describing the similarity between the relative pairwise distances between 42 amine GPCR domain sequences in common as assessed by (A) all shortest paths between  $-\log_{10}(\text{BLAST E-values})$ , (B) the shortest paths between sequences as displayed by the Organic two-dimensional graph layout algorithm, and (C) the shortest paths between sequences in the two dimensional Cytoscape force-directed layout, weighted by BLAST E-value. The pairwise BLAST E-values and the graph layout algorithm correspond to a network thresholded at an E-value of  $1 \times 10^{-33}$ .

**E. Organic Layout**

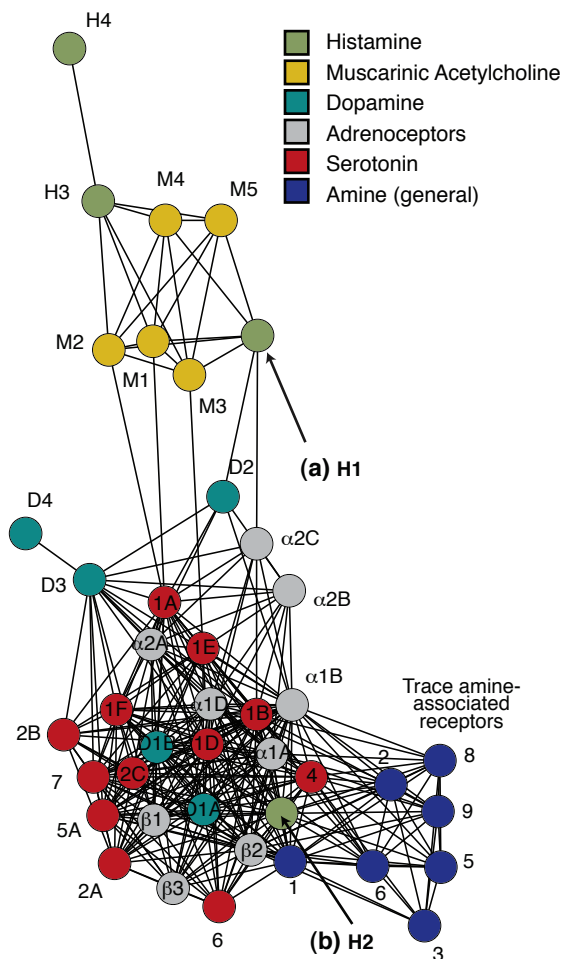

**F. Force-directed layout weighted by E-value**

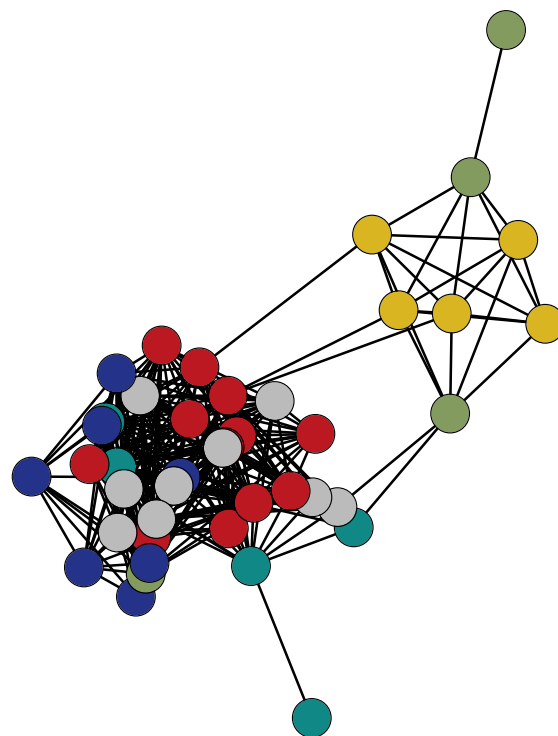

Supplement: pone.0004345.s004.pdf [file pone.0004345.s004.pdf]
