# Supplementary material for: Using Sequence Similarity Networks for Visualization of Relationships Across Diverse Protein Superfamilies
Source: PubMed Central journal article supplement (PMC2631154; doi:10.1371/journal.pone.0004345), 2009-02-03
Supplement: pone.0004345.s005.pdf [file pone.0004345.s005.pdf]

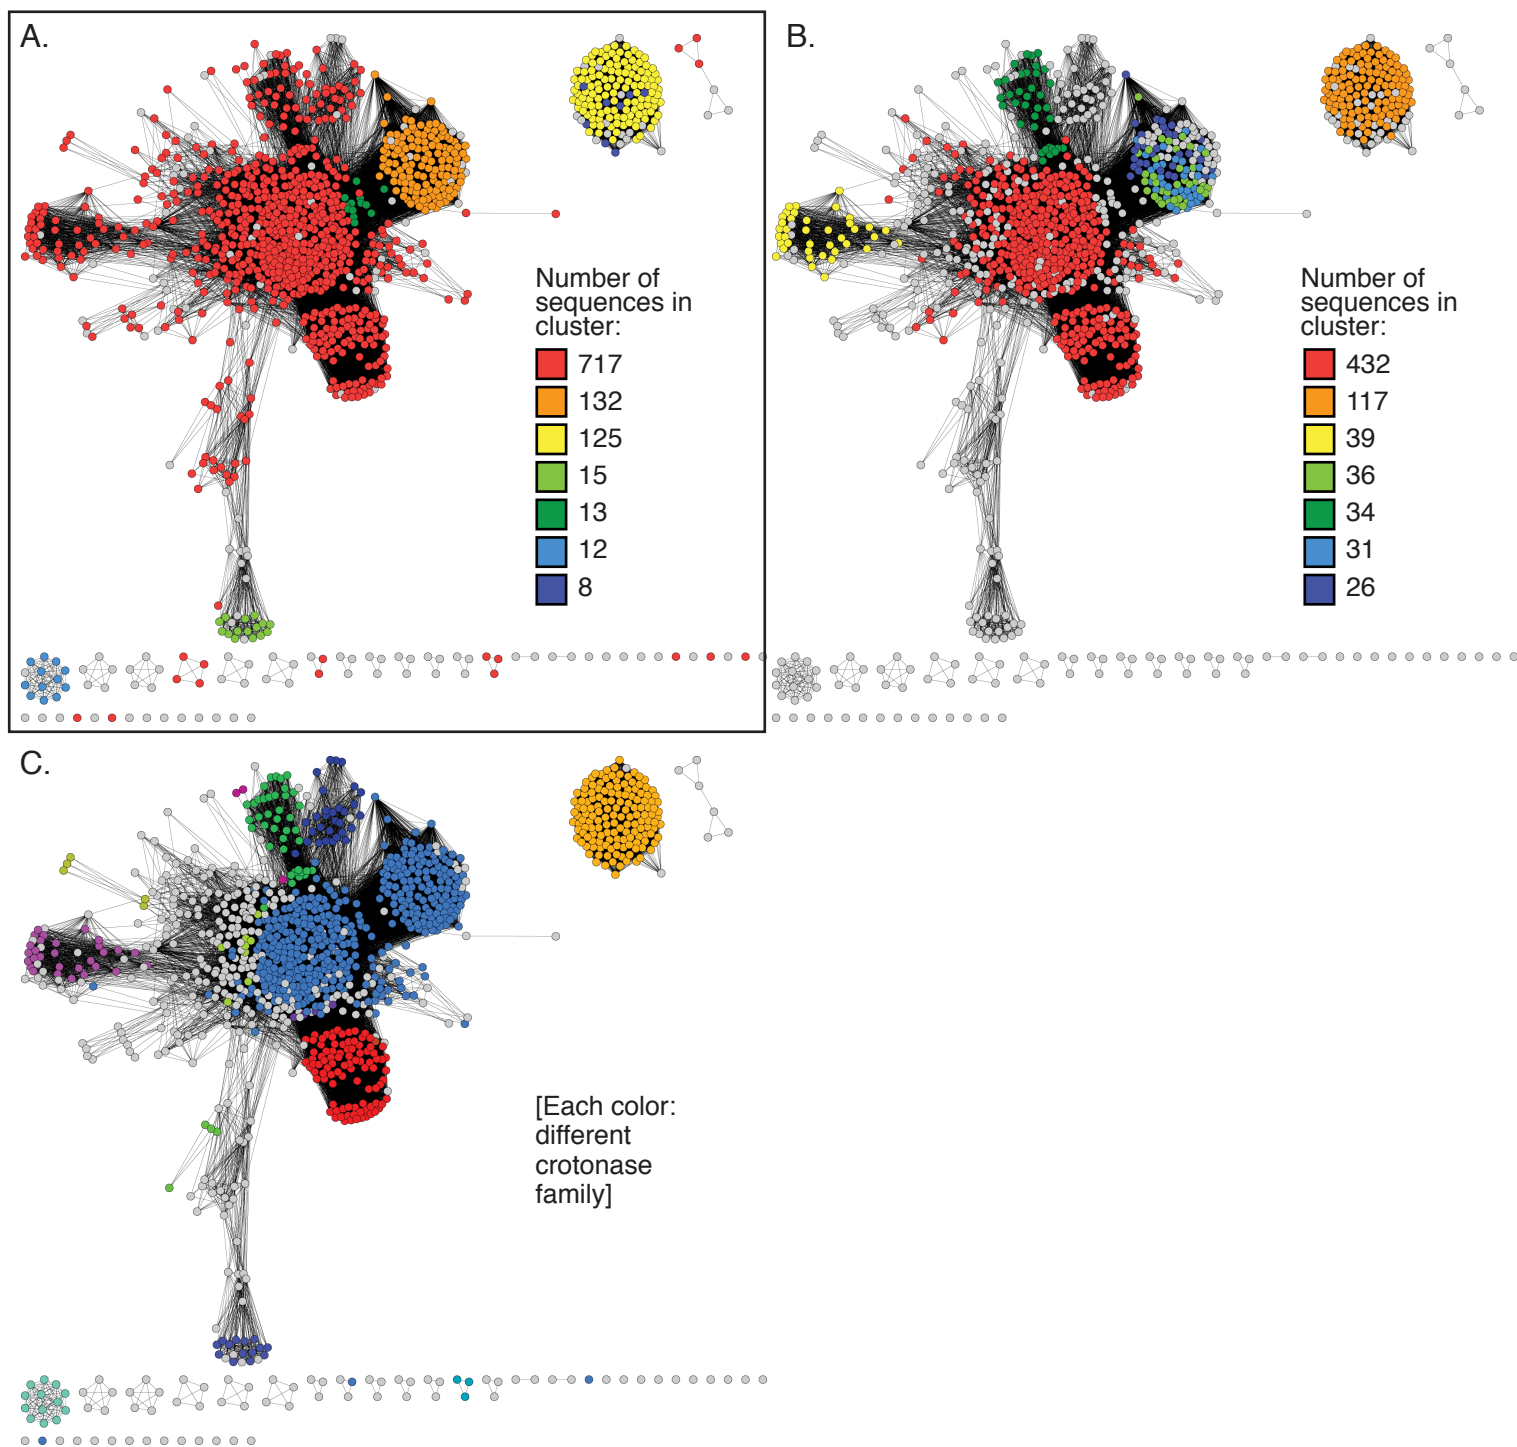

### Fig. S2. Comparison of network layout and clustering with BLASTCLUST

The displayed networks all describe the pairwise relationships between 1,170 sequences from the crotonase superfamily, thresholded at BLAST E-value of  $1 \times 10^{-30}$ . The worst edges displayed correspond to a median of 33% identity over alignments of 250 residues. Note that there is no alignment coverage requirement, and half of the edges with an E-value equal to  $1 \times 10^{-30}$  have a percent identity  $> 33\%$ . **A.** Here, the crotonase superfamily network is shown colored by membership in the seven most populated clusters as determined by the NCBI BLASTCLUST program, using a cut-off of 33% identity and requiring 90% coverage. **B.** Sequences are colored according to BLASTCLUST clusters using a cut-off of 40% identity and requiring 90% coverage. **C.** As a reference, the same network is shown colored according to family membership, based on catalytic function, as in Fig. 5A.
