# Supplementary material for: Using Sequence Similarity Networks for Visualization of Relationships Across Diverse Protein Superfamilies
Source: PubMed Central journal article supplement (PMC2631154; doi:10.1371/journal.pone.0004345), 2009-02-03
Supplement: pone.0004345.s006.pdf [file pone.0004345.s006.pdf]

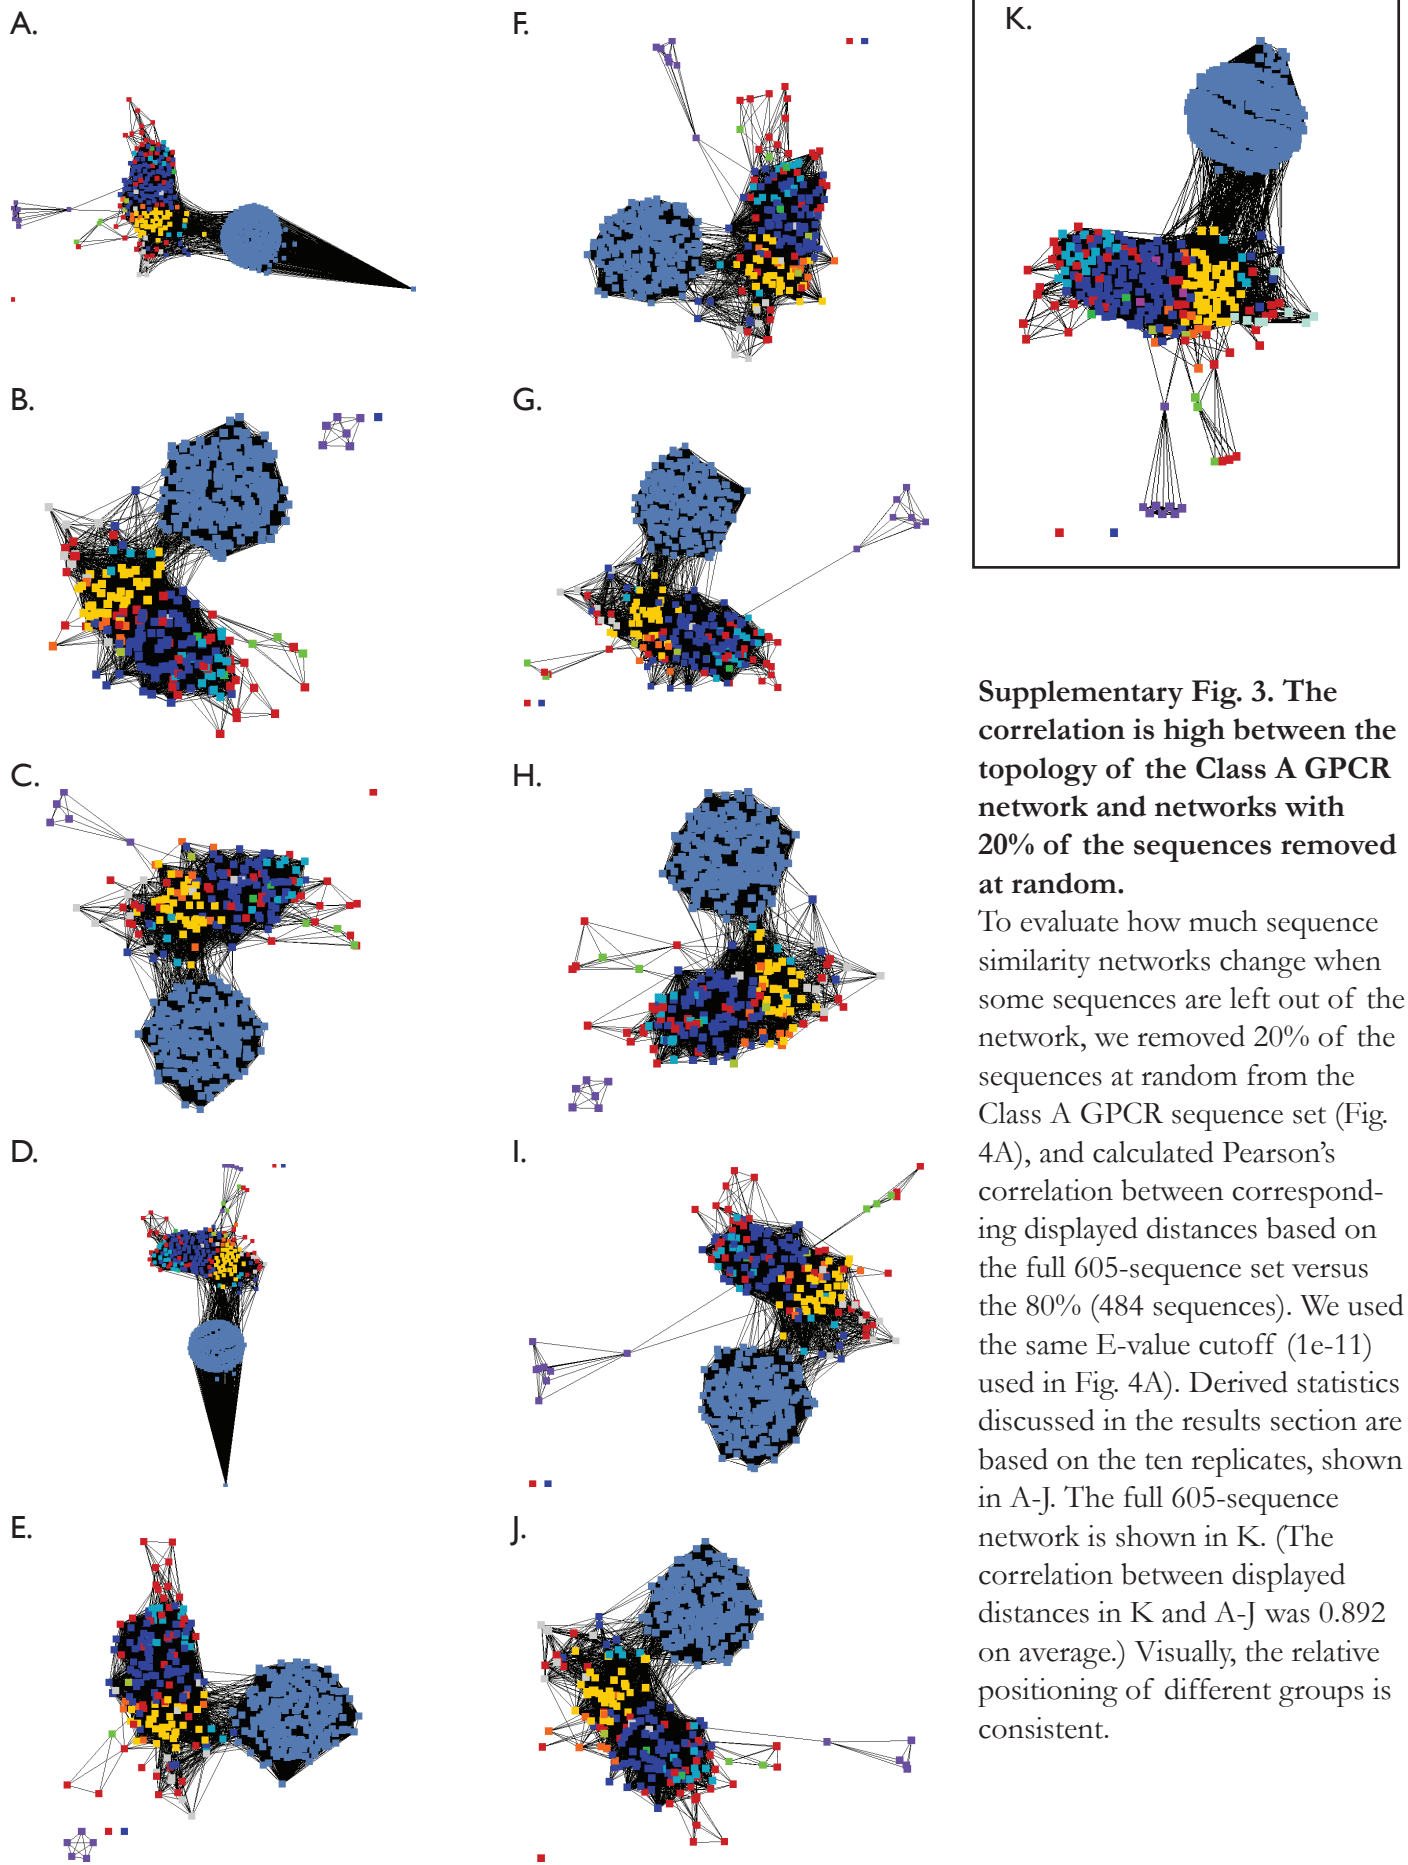

**Supplementary Fig. 3. The correlation is high between the topology of the Class A GPCR network and networks with 20% of the sequences removed at random.**

To evaluate how much sequence similarity networks change when some sequences are left out of the network, we removed 20% of the sequences at random from the Class A GPCR sequence set (Fig. 4A), and calculated Pearson's correlation between corresponding displayed distances based on the full 605-sequence set versus the 80% (484 sequences). We used the same E-value cutoff ( $1e-11$ ) used in Fig. 4A). Derived statistics discussed in the results section are based on the ten replicates, shown in A-J. The full 605-sequence network is shown in K. (The correlation between displayed distances in K and A-J was 0.892 on average.) Visually, the relative positioning of different groups is consistent.
